**Reliability of the correlative triad among aging, dopamine D2-like receptor availability, and cognition**

Eric J. Juarez<sup>1,2</sup>, Jaime J. Castellon<sup>1,2</sup>, Mikella A. Green<sup>1,2</sup>, Jennifer L. Crawford<sup>3</sup>, Kendra L. Seaman<sup>2,4</sup>, Christopher T. Smith<sup>5</sup>, Linh C. Dang<sup>5</sup>, David Matuskey<sup>6,7</sup>, Evan D. Morris<sup>6,7,8</sup>, Ronald L. Cowan<sup>5,9,10</sup>, David H. Zald<sup>5,9</sup>, Gregory R. Samanez-Larkin<sup>1,2</sup>

<sup>1</sup>Department of Psychology and Neuroscience, Duke University

<sup>2</sup>Center for Cognitive Neuroscience, Duke University

<sup>3</sup>Department of Psychology, Yale University

<sup>4</sup>Center for the Study of Aging and Human Development, Duke University

<sup>5</sup>Department of Psychology, Vanderbilt University

<sup>6</sup>Department of Radiology and Biomedical Imaging, Yale University

<sup>7</sup>Department of Psychiatry, Yale University

<sup>8</sup>Department of Biomedical Engineering, Yale University

<sup>9</sup>Department of Psychiatry and Behavioral Sciences, Vanderbilt University School of Medicine

<sup>10</sup>Department of Radiology and Radiological Sciences, Vanderbilt University Medical Center

**Author Note**

Jennifer Crawford is now at Washington University in St Louis. Linh Dang is now at Google.

Some of the results reported in this manuscript were presented in a poster at the Cognitive Neuroscience Society annual meeting (2018) and the Cognitive Aging Conference (2018).

Correspondence concerning this article should be addressed to Eric Juarez, Department of Psychology and Neuroscience, Duke University, Box 90999, Durham, NC 27708. Email:

[eric.juarez@duke.edu](mailto:eric.juarez@duke.edu)

**Acknowledgements:** This research was supported by National Institute on Aging Pathway to Independence Award R00-AG042596 and National Institute on Aging grant R01-AG044838.

**Data:** Data used in the manuscript can be viewed and downloaded from:

<https://osf.io/xjqe9/>

In text:

Author University 1: Vanderbilt University

Author University 2: Yale University

## Abstract

The evidence that dopamine function mediates the association between aging and cognition is one of the most widely cited findings in the cognitive neuroscience of aging. However, relatively few and relatively small studies have directly examined these associations. Here we examined correlations among adult age, dopamine D2-like receptor (D2R) availability, and cognition in two cross-sectional studies of healthy human adults. Subjects completed a short cognitive test battery and, on a separate day, a PET scan with either the high-affinity D2R tracer [<sup>18</sup>F]Fallypride (Study 1) or [<sup>11</sup>C]FLB457 (Study 2). Digit span, a measure of short-term memory maintenance and working memory, was the only cognitive test for which dopamine D2R availability partially mediated the age effect on cognition. In Study 1, age was negatively correlated with digit span. Striatal D2R availability was positively correlated with digit span controlling for age. The age effect on digit span was smaller when controlling for striatal D2R availability. Although other cognitive measures used here have individually been associated with age and D2R availability in prior studies, we found no consistent evidence for significant associations between low D2R availability and low cognitive performance on these measures. These results at best only partially supported the correlative triad of age, dopamine D2R availability, and cognition. While a wealth of other research in human and non-human animals demonstrates that dopamine makes critical contributions to cognition, the present studies suggest caution in using PET measures as evidence that dopamine D2R loss is a primary cause of broad age-related declines in fluid cognition.

**Keywords:** cognition, working memory, aging, dopamine, PET

### **Significance Statement**

Dopamine function and fluid cognitive performance both decline across the adult life span.

Previous work has also demonstrated associations between measures of dopamine function and fluid cognition. This led to the hypothesis that dopamine loss might mediate the decline in fluid cognition across the adult life span. However, in two studies with larger samples than many of the previously published studies, we did not find consistent support for a mediating role of dopamine D2-like receptor availability or even for strong associations between dopamine D2-like receptor availability and scores on neuropsychological measures of fluid cognitive abilities. Other in vivo measures of human dopamine function (e.g., D1-like receptor availability or dopamine release) may provide stronger and more reliable associations with cognitive performance.

## Introduction

There is considerable evidence from hundreds of studies over the past half century that fluid cognitive abilities decline over the course of the adult life span (Horn & Cattell, 1967; Park & Schwarz, 1999). These fluid cognitive abilities include processing speed, working memory, executive control, and episodic memory. Over the past few decades, functional and structural brain imaging have been used to identify the aspects of neural decline that account for these behavioral losses (Cabeza, Nyberg, & Park, 2016; Grady, 2012; Jagust, & D'Esposito, 2009).

Perhaps the earliest and most consistently reported adult age differences identified in human neuroimaging studies were reductions in aspects of dopamine function. Nearly 100 studies using PET or SPECT imaging have been conducted over the past thirty years documenting lower dopamine receptor and transporter availability in older compared to younger adults. According to a recent meta-analysis (Karrer et al., 2017), adult age is strongly and negatively correlated with D1-like receptor availability ( $r = -.77$ ), D2-like receptor (D2R) availability ( $r = -.56$ ), and dopamine transporter availability ( $r = -.68$ ). All of these measures of dopamine targets (receptors, transporters, or relevant enzymes) have been associated with fluid cognitive abilities (e.g., episodic memory, working memory, cognitive control, psychomotor speed, motor speed) in aging adults (Bäckman, Lindenberger, Li, & Nyberg, 2010).

Given these associations between aging and fluid cognition, aging and measures of dopamine function, and measures of dopamine function and cognition, Bäckman and colleagues (2006) proposed the “correlative triad” of aging, dopamine, and cognition. The correlative triad suggests that individual differences in dopaminergic status (assessed with PET/SPECT imaging of dopamine targets), but not chronological age, explain age-related deficits in fluid cognition. The suggestion is that dopaminergic decline is one of the primary contributors to cognitive

decline with age. The theory is one of the most highly cited in the neuroscience and psychology of aging. However, there is surprisingly little direct empirical data. Mixed findings, inconsistent reporting of results, and small sample sizes across these studies make evaluation of the reliability and reproducibility of these effects difficult (see Table 1). Meta-analysis of the previous empirical work is complicated by the inconsistent use of cognitive tests and/or selective reporting of only statistically significant dopamine-cognition associations (Karrer, 2017).

Only 10 out of 95 previously published datasets on adult age effects on dopamine targets (receptors, transporters, or relevant enzymes) using PET or SPECT reported cognitive associations (Karrer et al., 2017). Ten papers would be sufficient for meta-analysis, but almost none of the papers report associations with the same cognitive measures. The reported associations between different measures of dopamine function and cognitive function spanned several domains such as cognitive control (Lappin et al., 2009), episodic memory (Bäckman et al., 2000), or working memory (Bäckman et al., 2011), but the same cognitive measures were not reported across studies. Thus, given the assumptions that dopaminergic loss underlies fluid cognitive deficits, or may even be a biomarker for cognitive decline, it is important to establish the replicability and reliability of the effects.

Here, in two adult life-span studies at different sites using different tracers [<sup>11</sup>C]FLB457 and [<sup>18</sup>F]Fallypride, with complementary coverage of cortical and subcortical regions, we investigated whether adult age differences in standard neuropsychological measures of fluid cognition were due to individual differences in D2R availability.

## Method

Two studies at two different universities examined the replicability of associations between age, D2R availability, and cognitive test performance.

*Study 1.* Healthy participants were recruited from the greater [Author University 1 Location] community for [<sup>18</sup>F]Fallypride (hereafter referred to as Fallypride) scans performed at [Author University 1]. Study 1 consisted of 83 adults (ages 22 to 83 years, mean=49.80, SD=17.68, 35 males). Subjects were medically and mentally healthy and were assessed by a physical examination, comprehensive metabolic panel, complete blood count, EKG, and interviews of medical and psychiatric history. Inclusion criteria were the following: no illicit drug use in last 2 months, no use of any psychotropic medication in last 6 months, no current uncontrolled medical condition such as neurological, cardiovascular, endocrine, renal, liver, or thyroid pathology, no history of neurological or psychiatric disorders, no current tobacco or nicotine use, alcohol consumption no greater than 8 ounces of whiskey (~5 standard alcoholic drinks)/week, and no claustrophobia or other MRI contraindications. Females had negative pregnancy tests at intake and on the day of the scan. Approval for the Study 1 protocol was obtained from the [Author University 1] Human Research Protection Program and the Radioactive Drug Research Committee and all participants completed written informed consent.

*Study 2.* Healthy participants were recruited from the greater [Author University 2 Location] community for [<sup>11</sup>C]FLB457 (hereafter referred to as FLB) PET scans performed at [Author University 2]. Study 2 consisted of 37 adults (ages 26 to 79 years, mean=47.81, SD=16.93, 17 males); written informed consent was obtained for all subjects. FLB subjects were medically and mentally healthy and were assessed by a physical examination, comprehensive metabolic panel, complete blood count, EKG, and interviews of medical and psychiatric histories. Inclusion criteria were the following: no prescription or illicit drug use, no history of

tobacco or nicotine use, no current uncontrolled medical conditions such as cardiovascular, endocrine, renal, liver, or thyroid pathologies, no history of neurological or psychiatric disorders, alcohol consumption no greater than 8 ounces of whiskey (~5 standard alcoholic drinks)/week, and no claustrophobia or other MRI contraindications. Females had negative pregnancy tests at intake and on the day of the scan. Approval for the Study 2 protocol was obtained from the [Author University 2] Human Investigation Committee and the [Author University 2] Hospital Radiation Safety Committee and all participants completed written informed consent.

*Cognitive measures.* Four cognitive tests were collected in both studies. The Trail-Making Test (TMT) measures speed of processing, visual search, and cognitive flexibility (Crowe, 1998). The test includes two parts. In Part A, participants draw lines connecting numbers in numerical order (1-2-3-4) while an experimenter records time to completion. Completion time on Part A is used as a measure of psychomotor speed and visual search. Part B includes similar psychomotor and search demands but also includes alternation between numbers and letters (e.g., 1-A-2-B-3-C). The difference between these scores (B – A) is used as a measure of cognitive flexibility. Three measures of memory from the Wechsler Memory Scale WMS-III, two that assessed short-term maintenance (Digit Span) and working memory (Digit Span, Letter-Number Sequencing) and one that assessed longer-term memory (Verbal Paired Associates Delayed Recall) were also collected in both studies. The total score of forward plus backward digit span was used for analyses. In the forward digit span task, participants repeat a list of numbers as they were presented by the experimenter. In the backward digit span task, participants repeat a list of numbers in the reverse order. In the letter-number sequencing task, participants must reorder increasingly longer strings of letters and numbers in alphanumeric order. In the verbal paired associates task, participants learn a series of two-word associations



which they recall four times immediately after presentation by the experimenter. In the delayed recall portion of the task, participants repeat the paired associates after an extended delay. Only the delayed recall portion of the verbal paired associates task was used for analysis.

*PET Acquisition.*

*Study 1.* [<sup>18</sup>F]Fallypride, (S)-N-[(1-allyl-2-pyrrolidinyl)methyl]-5-(3[<sup>18</sup>F]fluoropropyl)-2,3-dimethoxybenzamide, was produced in the radiochemistry laboratory attached to the PET unit at [Author University 1] Medical Center, following synthesis and quality control procedures described in US Food and Drug Administration IND 47,245. Prior to the PET scan, T1-weighted magnetic resonance (MR) images (TFE SENSE protocol; Act. TR=8.9 ms, TE=4.6 ms, 192 TFE shots, TFE duration=1201.9 s, FOV=256x256 mm, voxel size=1x1x1 mm) were acquired on a 3T Philips Intera Achieva whole-body scanner (Philips Healthcare, Best, The Netherlands). PET data were collected on a GE Discovery STE (DSTE) PET scanner (General Electric Healthcare, Chicago, IL, USA). Serial scan acquisition was started simultaneously with a 5.0 mCi (185 MBq; average = 5.06 mCi, SD = 0.23) slow bolus injection of the dopamine D2/3 tracer [<sup>18</sup>F]Fallypride (median specific activity: 9.24 mCi/nmol). CT scans were collected for attenuation correction prior to each of the three emission scans, which together lasted approximately 3.5 hours with two breaks for subject comfort. Acquisition times for the dynamic PET scans have been reported previously (Smith et al., 2016). After decay correction and attenuation correction, PET scan frames were corrected for motion using SPM8 (Friston et al., 1995) with the 20<sup>th</sup> dynamic image frame of the first series serving as the reference image. The realigned PET frames were then merged and re-associated with their acquisition timing information in PMOD (PMOD Technologies, Zurich, Switzerland) 's PVIEW module to create a single 4D file for use in PMOD's PNEURO tool for further analysis (see below).

*Study 2.* [ $^{11}\text{C}$ ]FLB 457, 5-bromo-N-[[ $(2S)$ -1-ethyl-2-pyrrolidinyl]methyl]-3-methoxy-2-(methoxy- $^{11}\text{C}$ ) benzamide, was synthesized as previously described by Sandiego et al. (2015). PET scans were acquired on the High Resolution Research Tomograph (HRRT; Siemens Medical Solutions, Knoxville, TN, USA). [ $^{11}\text{C}$ ]FLB 457 (median specific activity: 7.80 mCi/nmol) was injected intravenously as a bolus (315 MBq; average = 8.62 mCi, SD = 2.03) over one minute by an automated infusion pump (Harvard Apparatus, Holliston, MA, USA). Prior to each scan a six-minute transmission scan was performed for attenuation correction. Dynamic scan data were acquired in list mode for 90 min following the administration of [ $^{11}\text{C}$ ]FLB 457 and reconstructed into 27 frames ( $6 \times 0.5$  mins,  $3 \times 1$  min,  $2 \times 2$  mins,  $16 \times 5$  mins) with corrections for attenuation, normalization, scatter, randoms, and dead time using the MOLAR (Motion-compensation OSEM List-mode Algorithm for Resolution-Recovery Reconstruction) algorithm (Carson, Barker, Liow, & Johnson, 2003). Event-by-event motion correction (Jin et al., 2013) was applied using a Polaris Vicra optical tracking system (NDI Systems, Waterloo, Canada) that detects motion using reflectors mounted on a cap worn by the subject throughout the duration of the scan. Prior to the PET scan, T1-weighted magnetic resonance (MR) images (MPRAGE protocol; TR=2.4 s, TE=1.9 ms, FOV=256x256 mm, voxel size=1x1x1 mm) were acquired on a 3T Trio whole-body scanner (Siemens Medical Systems, Erlangen, Germany).

*PET data processing.* Binding potential was estimated relative to non-displaceable tracer ( $\text{BP}_{\text{ND}}$ ) within ROIs using PMOD's PNEURO module. The Hammers atlas (Hammers et al., 2003) available internally in PNEURO and PNEURO's deep nuclei option was used to parcellate each subject's grey matter as determined from a segmentation of their T1 MRI image into 30 bilateral cortical areas (including amygdala and hippocampus), 5 bilateral deep nuclei (caudate,

putamen, ventral striatum, thalamus, and pallidum), plus bilateral cerebellum, and brainstem.

After parcellation, the MRI and PET data were matched (registered via a rigid matching procedure based on the normalized mutual information criterion) and PET data resampled to the MRI space (1x1x1mm). The PNEURO parcellation ROIs were then used to extract time activity curves (TACs) from the PET data before modeling. These TACs were then fitted using the simplified reference tissue model (Lammertsma & Hume, 1996) to obtain  $BP_{ND}$  values using PMOD's PKIN module with a merged, bilateral cerebellum ROI serving as the reference region. Partial volume-corrected (PVC) estimates of  $BP_{ND}$  were computed following the methods of Smith and colleagues (2017).

Mean  $BP_{ND}$  in the bilateral midbrain was extracted from an ROI drawn in MNI standard space using previously described guidelines (Dang et al., 2012, Dang et al., 2013, Mawlawi et al., 2001) and registered to PET images using the same transformations for cerebellum registration to PET images.

*Region-of-interest analyses.* To limit the number of statistical tests, we created volume-weighted  $BP_{ND}$  summary measures for each ROI. We limited our analyses to areas where averaged levels of uncorrected  $BP_{ND}$  exceeded group-averaged  $BP_{ND}$  obtained from white matter TACs that we also fitted in PKIN.

Within each study, linear regression analyses were used to evaluate the correlative triad. First, regression analyses examined the effects of age on cognitive performance. Second, regression analyses examined the effects of D2R  $BP_{ND}$  on cognitive performance controlling for the linear effect of age. Separate regression analyses were run for each cognitive test and ROI. Both studies had ROI data for midbrain, anterior cingulate, thalamus, amygdala, and hippocampus. Study 1 (but not Study 2) also included striatum. Given that previous studies

reported significant associations between D2R BP<sub>ND</sub> within many of these ROIs and some of these cognitive tests, we used a liberal statistical threshold of  $p < .05$ , two-tailed (Tables 1, 2) to indicate significant associations. We only conducted formal tests of mediation if two conditions were met: (1) age was negatively associated with cognitive performance and (2) D2R BP<sub>ND</sub> was positively associated with cognitive performance after controlling for age. To assess mediation, we started by using an early approach that was standard in the field when the correlative triad was proposed: is the effect of age on cognition significant before but not after controlling for D2R BP<sub>ND</sub>? We also computed bootstrapped estimates of the indirect effect (5000 replications) to evaluate whether age-related decline in D2R BP<sub>ND</sub> significantly carried the influence of age to cognitive performance.

All data and code are publicly available on OSF: <https://osf.io/xjqe9/>

*Whole-Brain Analyses.* To explore potential associations outside of the ROIs, whole-brain voxelwise analyses used uncorrected estimates of D2R BP<sub>ND</sub> (that were not PVC). Whole-brain analyses controlled for multiple comparisons using threshold-free cluster enhancement with 5000 permutations per contrast computed using the “randomise” function in FSL. Positive and negative contrasts were computed for each of the cognitive tasks for each study while controlling for age. Significance was assessed using a 0.05 threshold on the corrected p maps. FLB BP<sub>ND</sub> maps were smoothed at 8 mm prior to group-level analysis (Plaven-Sigra et al., 2017). If a region was identified that positively correlated with cognitive performance (i.e., higher BP<sub>ND</sub> = better performance), we conducted formal tests of mediation using the same procedures as above.

All beta coefficients for linear effects are reported as standardized betas.

## Results

## Study 1

*Effects of age on cognition.* In Study 1, Trails A and Trails B-A were positively correlated with age, indicating longer time to completion as age increased (Trails A:  $\beta_{81} = 0.461$ , [0.268, 0.655],  $p = 0.0001^a$ , Trails B-A:  $\beta_{81} = 0.222$ , [0.009, 0.434],  $p = 0.044^b$ ). The three memory-related tasks all negatively correlated with age (digit span total:  $\beta_{81} = -.274$ , [-0.483, -0.064],  $p = .012^c$ , letter number sequencing:  $\beta_{81} = -.554$ , [-0.735, -0.372],  $p < 0.0001^d$ , delayed recall:  $\beta_{77} = -0.614$ , [-0.790, -0.438],  $p < 0.0001^e$ ).

*Effects of age on dopamine D2R availability.* For four out of the six ROIs in Study 1, D2R BP<sub>ND</sub> was significantly negatively correlated with age (amygdala:  $\beta_{81} = -.292$ , [-0.500, -0.084],  $p=0.007^f$ , thalamus:  $\beta_{81}=-0.260$ , [-0.470, -0.049],  $p=0.018^g$ , midbrain:  $\beta_{81}=-0.504$ , [-0.693, -0.316],  $p<0.0001^h$ , striatum:  $\beta_{81}=-.450$ , [-0.644, -0.255],  $p<0.0001^i$ ). D2R BP<sub>ND</sub> in the hippocampal and the anterior cingulate ROIs did not significantly correlate with age (hippocampus:  $\beta_{81}=-0.201$ , [-0.414, 0.012],  $p=0.068^j$ , anterior cingulate cortex:  $\beta_{81} = -0.21$ , [-0.425, 0.001],  $p=0.054^k$ ).

*Effects of dopamine D2R availability on cognition.* When controlling for age in Study 1, only striatal D2R BP<sub>ND</sub> positively correlated with task performance such that higher binding was associated with better performance (for all correlations between D2R BP<sub>ND</sub> and cognitive tasks see Table 2). Striatal D2R BP<sub>ND</sub> was positively correlated with digit span total score ( $\beta_{81}=0.24$ , 95% CI=[0.010 0.471],  $p=0.044^l$ ) suggesting that higher D2R BP<sub>ND</sub> was associated with better task performance. Striatal D2R BP<sub>ND</sub> also positively correlated with length of time spent completing the Trails A task ( $\beta_{81}=0.270$ , [0.060, 0.479],  $p=0.014^m$ ), a counterintuitive finding suggesting that higher D2R availability was associated with worse task performance.

The whole-brain analyses of the Fallypride data revealed several regions where higher D2R BP<sub>ND</sub> was significantly associated with better memory on the verbal paired associates delayed recall test. There were positive correlations between delayed recall and D2R BP<sub>ND</sub> along the medial frontal gyrus, within anterior portions of superior and middle frontal gyri, and in superior portions of the body of the caudate. We created spherical ROIs in each of the two frontal cortical regions to evaluate potential mediation. We used an existing caudate ROI that was estimated during the PVC procedure. Unthresholded statistical maps can be found on NeuroVault at: <https://neurovault.org/collections/3707/>.

*Mediation Analyses.* The correlation between striatal D2R BP<sub>ND</sub> and digit span was the only effect within a priori ROIs to meet our criteria for mediation analyses. In Study 1, the effect of age on digit span was reduced from a significant effect of  $\beta = -.27^c$  to a nonsignificant effect of  $\beta = -.17^n$  after controlling for striatal D2R BP<sub>ND</sub> (see Figure 1). Although 40% of the total effect was mediated by striatal BP<sub>ND</sub>, bootstrapped estimates of the indirect effect were not significant,  $b = -.024$ , 95% CI = [-.053, -.001],  $z = -1.861$ ,  $p = .063^o$ , despite the modest effect size.

We also evaluated mediation within three regions that were identified in whole brain analyses to be positively correlated with delayed recall for verbal paired associates (medial frontal gyrus, superior/middle frontal gyrus, superior caudate). Within all of these regions, the effect of age on delayed recall was significant before and after controlling for D2R BP<sub>ND</sub> (medial frontal gyrus:  $\beta = -.61^e$  to  $\beta = -.46^p$ ; superior/middle frontal gyrus:  $\beta = -.61$  to  $\beta = -.52^q$ ; caudate:  $\beta = -.61$  to  $\beta = -.57^r$ ). Bootstrapped estimates of the indirect effect of D2R BP<sub>ND</sub> were not significant in the superior/middle frontal gyrus,  $b = -0.012$ , 95% CI = [-0.033, 0.006],  $z = -1.217$ ,  $p = 0.224^s$ , medial frontal gyrus,  $b = -.02$ , 95% CI = [-0.054, 0.011],  $z = -1.244$ ,  $p = 0.214^t$ , or

caudate,  $b = -.006$ , 95% CI=[-.022, .005],  $z = -.925$ ,  $p = .355^u$ . Thus, none of the associations in these additional regions identified in the whole-brain analyses were consistent with statistical mediation by D2R availability of the effect of age on delayed recall.

### *Study 2.*

*Effects of age on cognition.* In Study 2, Trails A and Trails B-A were significantly and positively correlated with age, indicating longer time to completion at older compared to younger ages (Trails A:  $\beta_{35} = 0.445$ , [0.149, 0.742],  $p = 0.006^v$ , Trails B-A:  $\beta_{35} = 0.499$ , [0.211, 0.786],  $p = 0.002^w$ ). Long-term memory and one working memory task were significantly and negatively correlated with age (delayed recall:  $\beta_{35} = -0.521$ , [-0.803, -0.238],  $p = 0.001^x$ , letter number sequencing:  $\beta_{35} = -0.393$ , [-0.697, -0.088],  $p = 0.016^y$ ). Digit span did not correlate with age ( $\beta_{35} = -0.070$ , [-0.401, 0.260]  $p = 0.678^z$ ) in Study 2, although the confidence interval of the effect of age on digit span was highly overlapping with Study 1.

*Effects of age on dopamine D2R availability.* For three out of the five ROIs in Study 2, D2R BP<sub>ND</sub> was significantly and negatively correlated with age (midbrain:  $\beta_{35} = -0.640$ , [-0.895, -0.386],  $p < 0.0001^{aa}$ , anterior cingulate cortex:  $\beta_{35} = -0.477$ , [-0.769, -0.186],  $p = 0.003^{ab}$ , amygdala:  $\beta_{35} = -0.340$ , [-0.652, -0.029],  $p = 0.039^{ac}$ ). The hippocampal and thalamic ROIs did not have significant negative correlations between age and D2R BP<sub>ND</sub> (thalamus:  $\beta_{35} = -0.216$ , [-0.540, 0.106],  $p = 0.197^{ad}$ , hippocampus:  $\beta_{35} = -0.161$ , [-0.488, 0.166],  $p = 0.341^{ae}$ ).

*Effects of dopamine D2R availability on cognition.* When controlling for age in Study 2, letter number sequencing total score negatively correlated with D2R BP<sub>ND</sub> in the midbrain ( $\beta_{34} = -0.453$ , [-0.826, -0.081],  $p = 0.023^{af}$ ) and the hippocampus ( $\beta_{34} = -0.323$ , [-0.617, -0.030],  $p = 0.038^{ag}$ ), (for all correlations between task and D2R BP<sub>ND</sub> see Table 3) such that higher D2R BP<sub>ND</sub> was associated with worse performance. Likewise, Trails B-A was positively correlated

with D2R BP<sub>ND</sub> in the midbrain ( $\beta_{34} = 0.390$ , [0.034, 0.746],  $p = 0.039^{\text{ah}}$ ) such that higher D2R availability was associated with worse performance.

The whole-brain analyses of the FLB data did not reveal any regions where higher D2R BP<sub>ND</sub> was significantly associated with better performance. There were negative correlations with letter-number sequencing and D2R BP<sub>ND</sub> in lateral temporal cortex and lateral occipital cortex. There were positive correlations with Trails B-A and D2R BP<sub>ND</sub> in superior and middle temporal gyrus. These effects were opposite of the predicted direction such that higher D2R availability corresponded to worse performance. Thus, we did not evaluate mediation for any of these effects within the FLB data. Unthresholded statistical maps can be found on NeuroVault at: <https://neurovault.org/collections/3707/>.

Given the positive associations between delayed recall and Fallypride D2R BP<sub>ND</sub> in Study 1, we also evaluated associations between memory tasks and FLB D2R BP<sub>ND</sub> and potential mediation by FLB D2R BP<sub>ND</sub> in Study 2 within the two regions identified in Study 1 that were available for analysis in Study 2 (medial frontal gyrus, superior/middle frontal gyrus). D2R BP<sub>ND</sub> was not correlated with delayed recall in either of these regions (medial frontal gyrus:  $\beta = -.11^{\text{am}}$ ; superior/middle frontal gyrus:  $\beta = .07^{\text{an}}$ ). Given the lack of association between D2R BP<sub>ND</sub> and delayed recall there was an expected lack of a mediation by D2R BP<sub>ND</sub>. The effect of age on delayed recall was significant before and after controlling for D2R BP<sub>ND</sub> (medial frontal gyrus:  $\beta = -.52^z$  to  $\beta = -.60^{\text{ai}}$ ; superior/middle frontal gyrus:  $\beta = -.52$  to  $\beta = -.48^{\text{aj}}$ ); bootstrapped estimates of the indirect effect were not significant in the medial frontal gyrus,  $b = -0.013$ , 95% CI = [-0.024, .055],  $z = .658$ ,  $p = .51^{\text{ak}}$ , or superior/middle frontal gyrus,  $b = -0.007$ , 95% CI = [-0.055, .022],  $z = -.388$ ,  $p = .698^{\text{al}}$ . Overall the associations between cortical D2R availability and memory were not



consistent across studies using different tracers (Study 1: Fallypride; Study 2: FLB) and neither set of results provided evidence for mediation.

## Discussion

Here, in two cross-sectional studies of adulthood, we examined associations between aging, dopamine D2R availability using PET imaging, and cognition which form the bases for the correlative triad theory. We found that very few associations were significant and only one was in the predicted direction. While associations between aging and cognition and aging and D2R availability were mostly significant and highly reproducible across studies, the only region and measure that was consistent with the correlative triad was striatal D2R BP<sub>ND</sub> and digit span in Study 1 that used Fallypride. Although inclusion of the dopamine D2R measure reduced the age effect on digit span from significant to non-significant, statistical evaluation of mediation was non-significant. Our findings provide partial support for the correlative triad in one data set, but qualify the suggestion that dopamine receptor status as assessed with PET imaging in humans might be a broad biomarker of cognitive aging.

Several individual prior studies have reported associations between D2R availability across a variety of different cognitive measures. As a result, we did not have strong hypotheses about which of the cognitive measures would show the strongest effects. Consistent with the positive associations reported here between D2R availability and short-term maintenance, several prior studies reported associations between dopamine target measures and short-term maintenance and/or working memory (positive: Erixon-Lindroth, et al., 2005 (dopamine transporter) ; Backman, et al., 2011 (D1) ; Salami, et al., 2018 (D2); negative: Reeves, 2005 (D2). Two of the cognitive measures collected in the present studies assessed aspects of working

memory: digit span total score and letter-number sequencing. Digit span, but not letter-number sequencing, was negatively associated with age and positively associated with striatal D2R availability in Study 1 using Fallypride. It is unclear why there was an association with digit span but not letter-number sequencing, given prior evidence that both tasks load onto the same latent factor (Parmenter, Shucard, Benedict, & Shucard, 2006), although it may be noted that letter number sequencing requires a more complex manipulation of information in working memory. One previous study indicated that digit span and logical memory were most strongly correlated with D2R availability when controlling for age (Chen et al., 2005). However, the majority of prior studies reporting associations between measures of dopamine targets (receptors, transporters, or relevant enzymes) and working memory used n-back tasks (see Salami et al., 2018). Interestingly, some research suggests that digit span does not strongly correlate with n-back, although these studies did not specifically use the combined forward and backward score used in the present studies (Miller, Price, Okkun, Montijo, & Bowers, 2009; Parmenter, Shucard, Benedict, & Shucard, 2006). Nevertheless, it is possible that we would have detected stronger associations between D2R availability and working memory if we used an n-back task.

We observed positive associations between digit span and D2R availability in the striatum but not in any other regions of interest. Although task-based neuroimaging studies most often highlight associations between prefrontal cortical function and working memory (Braver et al., 1997; Wager & Smith, 2003; Constantinidis & Klingberg, 2016), striatal dopamine synthesis capacity has also been associated with working memory (Landau, 2009). Additionally, lesions to the striatum produce deficits in working memory and many other fluid cognitive tasks assumed to be primarily dependent on the prefrontal cortex (Rubin, 1999). Additionally, a pharmacological fMRI study showed that amphetamine administration increased striatal as well

as frontal cortical BOLD signal during an n-back working memory task in older and younger adults (Garrett et al. 2015). The lack of associations between frontal D2R availability reported here might reflect the lower signal in lateral cortical regions for the radiotracers used in this study, particularly for Fallypride (Mukherjee et al., 2002; Vandehey et al., 2010; Zald et al., 2010). Estimates of frontal D2R availability using FLB are higher compared to Fallypride, but many lateral regions still have quite low signal which may constrain the variance available to explain variation in cognition. Thus, it is possible that there are positive associations between D2R availability and cognition in regions of the frontal cortex that we were not able to detect. While we did observe an association between striatal D2R availability and digit span this could only be tested within Study 1 using Fallypride (since FLB used in Study 2 does not produce stable estimates of striatal BP<sub>ND</sub>). Thus, we could not evaluate the replicability of that effect across data sets.

Exploratory whole-brain analyses identified additional frontal cortical regions that were positively associated with delayed recall in Study 1 using Fallypride. However, additional analyses provided no evidence for statistical mediation. In fact, the effects of age on delayed recall were nearly the same before or after controlling for D2R availability in these frontal regions in both studies. Finally, the associations between frontal D2R availability and delayed recall were not significant in Study 2 that used FLB which produces higher estimates of cortical D2R availability. Overall, there was no evidence for frontal cortical mediation within Study 1 using Fallypride or Study 2 using FLB and the associations between dopamine D2R availability and delayed recall were inconsistent across Studies 1 and 2.

Contrary to our hypotheses and the correlative triad theory, we also observed some *negative* associations between dopamine D2R availability and cognition such that higher D2R

availability was associated with worse task performance. Other studies have also reported such negative associations. For example, in a recent study of a cohort of older adults, one subgroup had lower D2R availability in the striatum but also had higher working memory scores (Lövdén et al. 2017). Levels of D2R availability could reflect compensatory changes in response to lower endogenous DA levels. Thus, it is possible that the observed negative associations are indicators that relatively higher endogenous dopamine levels are associated with better cognitive performance. However, the consistent and highly replicable evidence for lower D2R availability in older age and lower fluid cognitive performance in older age runs counter to this interpretation especially in cross-sectional life-span studies. Note, also, that these effects were not consistent across samples within regions that were reported across both studies.

Though studies that laid the foundation for the correlative triad theory also used D2R tracers, it is possible that other components of dopamine function, such as other receptor subtypes or dopamine release, are better correlated with fluid cognitive ability. For example, D1-like receptor availability has been associated with motor performance (Wang et al., 1998) as well as several memory measures (Sawaguchi & Goldman-Rakic, 1991; Sawaguchi, 2001; Karlsson, 2009, Backman, 2011). However, as noted earlier it is difficult to assess the reliability of these effects given the limited number of studies and inconsistent use of tasks.

Overall, many of the individual previously reported associations between dopamine D2R availability and cognition in smaller samples were not replicated in the present studies (e.g. Bäckman, 2000; Erixon-Lindroth et al., 2005). It is possible that the neuropsychological test measures used in the present studies lacked sensitivity relative to the tasks used in prior studies. Some prior studies reported associations between measures of dopamine function and measures of memory or cognitive flexibility based on scores from experimental behavioral tasks rather

than neuropsychological measures. It is possible that those tasks better assess aspects of cognitive function that are most related to dopamine function. Additionally, recent work suggests that individual differences in gene expression moderates the relationship between D2R availability and cognitive test scores (Karalija et al., in press). Thus, associations between D2R availability and cognitive measures in the present studies may be masked by genetic variation (although this would necessitate significant refinement of the correlative triad hypothesis). Future studies should evaluate the replicability of these genetic interaction effects.

A final and critical limitation of our findings, and the literature in general, is that despite our relatively large samples, conclusions about aging are drawn from cross-sectional data. It is challenging to accurately evaluate statistical mediation of aging from cross-sectional data. Mediation in cross-sectional data may not generalize in longitudinal samples, and a mediation effect in a longitudinal sample may exist despite a lack of significant mediation in cross-sectional data (Raz & Lindenberger, 2011). As in any cross-sectional study, the results reported here may be related to cohort rather than aging effects. Ongoing longitudinal work will be able to better address potential longitudinal associations between the dopamine system and cognition (Nevalainen et al., 2015).

Overall, the present findings suggest that associations between age differences in dopamine D2R availability and fluid cognition may not be as replicable or broad as initially assumed. There was some suggestive evidence for an association between D2R availability and short-term memory maintenance, but the majority of previously reported findings were not replicated here. A wealth of other research in human and non-human animals demonstrates that dopamine function makes critical contributions to cognition, but the present studies suggest caution in using PET data to make generalizations that dopamine receptor loss is a primary cause

of broad age-related declines in fluid cognition. Specifically, the lack of replicable D2R-cognition associations cautions against the idea that D2 receptor status can be used as a general biomarker of cognitive aging in healthy adults.

## Tables

Table 1. Summary of previous studies investigating aging, dopamine targets (receptors, transporters, or relevant enzymes), and cognition. D1R = dopamine D1-like receptors; D2R = dopamine D2-like receptors; DAT = dopamine transporter.

| <b>First author</b> | <b>Year</b> | <b>N</b> | <b>Cognitive measure</b>                                                                           | <b>Other cognitive measures</b>                                                                                                                                                                                                                                 | <b>Target</b>      |
|---------------------|-------------|----------|----------------------------------------------------------------------------------------------------|-----------------------------------------------------------------------------------------------------------------------------------------------------------------------------------------------------------------------------------------------------------------|--------------------|
| Bäckman             | 2000        | 11       | Dots, Trails A, FaceRecognition, Word recognition                                                  | NA                                                                                                                                                                                                                                                              | D2R                |
| Bäckman             | 2011        | 40       | spatial working memory task                                                                        | Verbal free recall, digit symbol, vocabulary, information,                                                                                                                                                                                                      | D1R                |
| Berry               | 2016        | 36       | Two condition task switching                                                                       | California Verbal learning test, WMSIII logical memory story and visual reproduction, listening span, category fluency, WMS II digit span (forward/backward), arithmetic tasks, digit symbol test, stroop, WMSIII mental control test, trails a, finger tapping | Synthesis capacity |
| Braskie             | 2008        | 37       | Listening span, controlled oral word association (FAS), category fluency, stroop, trail making b-a | wisconsin card sort test, digit span                                                                                                                                                                                                                            | Synthesis capacity |
| Chen                | 2005        | 62       | WMS-R                                                                                              | NA                                                                                                                                                                                                                                                              | D2R                |

---

|                 |      |          |                                                                                                                                                |                                               |                                      |
|-----------------|------|----------|------------------------------------------------------------------------------------------------------------------------------------------------|-----------------------------------------------|--------------------------------------|
| Dreher          | 2008 | 21       | Slot machine task                                                                                                                              | NA                                            | Synthesis capacity                   |
|                 |      |          | word recall, figure recall, face recognition, visuospatial working memory, controlled oral association test (verbal fluency), information test |                                               |                                      |
| Erixon-Lindroth | 2005 | 12       | from WAIS_R                                                                                                                                    | NA                                            | DAT                                  |
|                 |      |          | Sequential motor learning /adapted version of tower of london                                                                                  |                                               | D2R ligand displacement (DA release) |
| Lappin          | 2009 | 6/<br>10 |                                                                                                                                                | NA                                            |                                      |
|                 |      |          |                                                                                                                                                | Auditory consonant trigrams task, stroop task |                                      |
| Mozley          | 2001 | 66       | Pennsylvania verbal learning test                                                                                                              |                                               | DAT                                  |
|                 |      |          | Spatial span, spatial working memory task, tower of london                                                                                     |                                               |                                      |
| Reeves          | 2005 | 30       |                                                                                                                                                | NA                                            | D2R                                  |



Table 2. Region of interest analyses for Study 1. Correlations between cognitive test scores and D2R BP<sub>ND</sub> controlling for age (N=83). \* p < .05 uncorrected

|                       | Trails A                               | Trails B-A               | Digit Span                             | Letter-<br>Number<br>Sequencing | Verbal<br>Paired<br>Associates<br>Delayed<br>Recall |
|-----------------------|----------------------------------------|--------------------------|----------------------------------------|---------------------------------|-----------------------------------------------------|
| Midbrain              | .197 [-<br>0.0237,0.418]               | .032 [-<br>0.216,0.279]  | .115 [-<br>0.127,0.359]                | -.104 [-<br>0.314,0.106]        | -.007 [-<br>0.213,0.199]                            |
| Striatum              | <b>.270*</b><br>[ <b>0.060,0.479</b> ] | -.123 [-<br>0.360,0.115] | <b>.241*</b><br>[ <b>0.010,0.471</b> ] | .039 [-<br>0.165,0.243]         | .141 [-<br>0.053,0.336]                             |
| Anterior<br>cingulate | .140 [-<br>0.0564,0.337]               | -.017 [-<br>0.202,0.235] | -.007 [-<br>0.223,0.208]               | -.089 [-<br>0.275,0.097]        | .112 [-<br>0.067,0.292]                             |
| Thalamus              | .112 [-<br>0.0876,0.312]               | -.140 [-<br>0.359,0.079] | .042 [-<br>0.176,0.260]                | -.063 [-<br>0.251,0.126]        | -.020 [-<br>0.204,0.163]                            |
| Amygdala              | .084 [-<br>0.118,0.287]                | .098 [-<br>0.124,0.320]  | .025 [-<br>0.195,0.245]                | -.149 [-<br>0.337,0.039]        | .039 [-<br>0.146,0.224]                             |
| Hippocampus           | .0294 [-<br>0.169,0.228]               | .028 [-<br>0.191,0.246]  | -.010 [-<br>0.225,0.205]               | -.090 [-<br>0.275,0.095]        | -.052 [-<br>0.232,0.128]                            |

Table 3. Region of interest analyses for Study 2. Correlations between cognitive test scores and D2R BP<sub>ND</sub> controlling for age (N=37). \* p < .05 uncorrected

|                       | Trails A                 | Trails B-A                       | Digit Span                | Letter-<br>Number<br>Sequencing        | Verbal<br>Paired<br>Associates<br>Delayed<br>Recall |
|-----------------------|--------------------------|----------------------------------|---------------------------|----------------------------------------|-----------------------------------------------------|
| Midbrain              | -.289 [-<br>0.669,0.090] | <b>.390* [0.0341,<br/>0.746]</b> | -.376 [-<br>0.794,0.0416] | <b>-.453*<br/>[-0.826,-<br/>0.081]</b> | -.169 [-<br>0.538,0.200]                            |
| Anterior<br>cingulate | -.008 [-<br>0.350,0.335] | .189 [-<br>0.136,0.515]          | -.076 [-<br>0.457,0.305]  | -.184 [-<br>0.530,0.163]               | -.048 [-<br>0.374,0.278]                            |
| Thalamus              | -.092 [-<br>0.399,0.215] | .213 [-<br>0.076,0.503]          | -.146 [-<br>0.486,0.194]  | -.226 [-<br>0.534,0.081]               | .136 [-<br>0.155,0.426]                             |
| Amygdala              | -.191 [-<br>0.505,0.122] | .199 [-<br>0.103,0.502]          | -.080 [-<br>0.436,0.275]  | -.313 [-<br>0.624,-0.001]              | -.155 [-<br>0.456,0.146]                            |
| Hippocampus           | .012 [-<br>0.292,0.317]  | .140 [-<br>0.151,0.431]          | -.143 [-<br>0.479,0.193]  | <b>-.323* [-<br/>0.617,-0.030]</b>     | .082 [-<br>0.208,0.371]                             |

Table 4. Statistical Table

| Line | Data/model                                                                                            | Type of Test                                         | Confidence      |
|------|-------------------------------------------------------------------------------------------------------|------------------------------------------------------|-----------------|
| a    | trails A~age                                                                                          | linear regression                                    | [0.268,0.655]   |
| b    | trails B-A ~ age                                                                                      | linear regression                                    | [0.009,0.434]   |
| c    | digit span total ~age                                                                                 | linear regression                                    | [-0.483,-0.064] |
| d    | letter number sequencing ~age                                                                         | linear regression                                    | [-0.735,-0.372] |
| e    | delayed recall ~ age                                                                                  | linear regression                                    | [-0.790,-0.438] |
| f    | amygdala ~ age                                                                                        | linear regression                                    | [-0.500,-0.084] |
| g    | thalamus ~ age                                                                                        | linear regression                                    | [-0.470,-0.049] |
| h    | midbrain ~age                                                                                         | linear regression                                    | [-0.693,-0.316] |
| i    | striatum ~age                                                                                         | linear regression                                    | [-0.644,-0.255] |
| j    | hippocampus ~age                                                                                      | linear regression                                    | [-0.414, 0.012] |
| k    | anterior cingulate ~ age                                                                              | linear regression                                    | [-0.425, 0.001] |
| l    | digit span total ~striatum+age                                                                        | linear regression                                    | [0.010 0.471]   |
| m    | trails A~striatum+age                                                                                 | linear regression                                    | [0.060,0.479]   |
| n    | digit span total ~striatum +age                                                                       | linear regression                                    | [-0.395,0.0647] |
| o    |                                                                                                       | indirect effect<br>(regression)                      | [-.053, -.001]  |
| p    | delayed recall~medial frontal<br>gyrus +age<br>delayed<br>recall~superior/middle frontal<br>gyrus+age | linear regression                                    | [-0.731,-0.186] |
| q    |                                                                                                       | linear regression                                    | [-0.740,-0.304] |
| r    | delayed recall~caudate+age<br>Superior/middle frontal<br>gyrus*age                                    | linear regression<br>indirect effect<br>(regression) | [-0.763,-0.370] |
| s    |                                                                                                       | indirect effect<br>(regression)                      | [-0.033,0.006]  |
| t    | Medial frontal gyms*age                                                                               | indirect effect<br>(regression)                      | [-0.054,0.011]  |
| u    | Caudate*age                                                                                           | (regression)                                         | [-.022,.005]    |
| v    | trails A~age                                                                                          | linear regression                                    | [0.149,0.742]   |
| w    | trails B-A ~ age                                                                                      | linear regression                                    | [0.211,0.786]   |
| x    | delayed recall ~ age                                                                                  | linear regression                                    | [-0.803,-0.238] |
| y    | letter number sequencing ~age                                                                         | linear regression                                    | [-0.697,-0.088] |
| z    | digit span total ~age                                                                                 | linear regression                                    | [-0.401,0.260]  |
| aa   | midbrain ~age                                                                                         | linear regression                                    | [-0.895,-0.386] |
| ab   | anterior cingulate ~ age                                                                              | linear regression                                    | [-0.769,-0.186] |
| ac   | amygdala ~ age                                                                                        | linear regression                                    | [-0.652,-0.029] |
| ad   | thalamus ~ age                                                                                        | linear regression                                    | [-0.540,0.106]  |
| ae   | hippocampus ~age                                                                                      | linear regression                                    | [-0.488,0.166]  |
| af   | letter number sequencing<br>~midbrain+age                                                             | linear regression                                    | [-0.826,-0.081] |

RUNNING HEAD: Aging, Dopamine, and Cognition 28

|    |                                                        |                                      |                 |
|----|--------------------------------------------------------|--------------------------------------|-----------------|
| ag | letter number sequencing<br>~hippocampus+age           | linear regression                    | [-0.617,-0.030] |
| ah | trails B-A ~ midbrain+age                              | linear regression                    | [0.034,0.746]   |
| ai | delayed recall~medial frontal<br>gyrus+age             | linear regression                    | [-0.980,-0.212] |
| aj | delayed<br>recall~superior/middle frontal<br>gyrus+age | linear regression<br>indirect effect | [-0.851,-0.106] |
| ak | Medial frontal gyrus*age                               | (regression)                         | [-.024, .055]   |
| al | Superior/middle frontal<br>gyrus*age                   | indirect effect<br>(regression)      | [-.055, .022]   |
| am | delayed recall~medial frontal<br>gyrus+age             | linear regression                    | [-0.50,0.27]    |
| an | delayed<br>recall~superior/middle frontal<br>gyrus+age | linear regression                    | [-0.31,0.44]    |

## Figures

*Figure 1.* Associations between age, striatal dopamine D2R availability ( $BP_{ND}$ ), and digit span.

Age significantly and negatively correlated with striatal dopamine D2R availability. Striatal dopamine D2R availability was significantly and positively correlated with digit span before controlling for age and after controlling for age (effect within parentheses). The brain image displays a voxelwise t-statistic map within the striatal ROI for visualization of regional variation in the association between D2R availability and digit span. The effect of age on digit span was reduced from significant to nonsignificant (effect reported within parentheses) after controlling for striatal D2R availability. All scatterplots display simple pairwise associations between variables without covariates. Effect sizes displayed are standardized linear effects. \*  $p < .05$ , \*\*  $p < .01$ , \*\*\*  $p < .001$

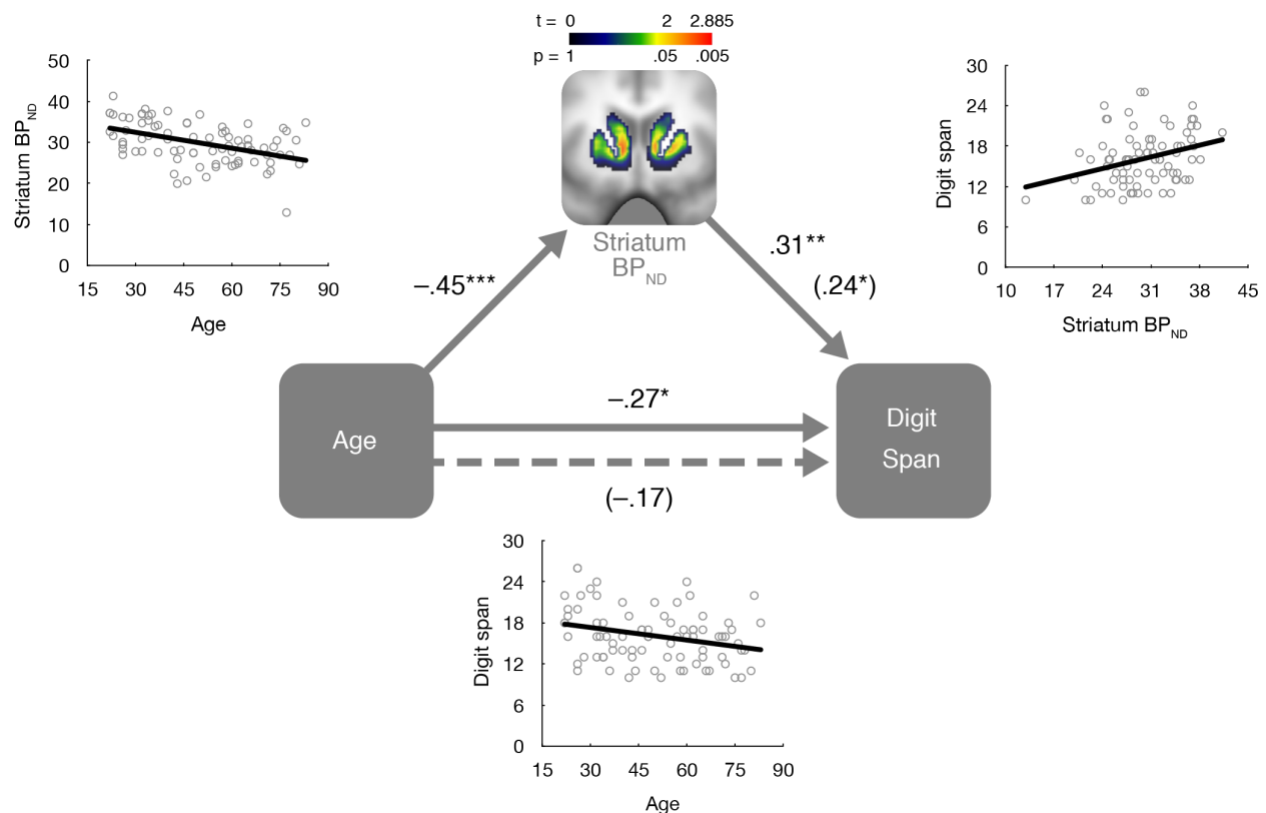

## References

- Bäckman, L., Ginovart, N., Dixon, R. A., Wahlin, T.-B. R., Wahlin, Å., Halldin, C., & Farde, L. (2000). Age-Related Cognitive Deficits Mediated by Changes in the Striatal Dopamine System. *American Journal of Psychiatry*, 157(4), 635–637. <https://doi.org/10.1176/ajp.157.4.635>
- Bäckman, L., Karlsson, S., Fischer, H., Karlsson, P., Brehmer, Y., Rieckmann, A., ... Nyberg, L. (2011). Dopamine D1 receptors and age differences in brain activation during working memory. *Neurobiology of Aging*, 32(10), 1849–1856. <https://doi.org/10.1016/j.neurobiolaging.2009.10.018>
- Bäckman, L., Lindenberger, U., Li, S.-C., & Nyberg, L. (2010). Linking cognitive aging to alterations in dopamine neurotransmitter functioning: Recent data and future avenues. *Neuroscience & Biobehavioral Reviews*, 34(5), 670–677. <https://doi.org/10.1016/j.neubiorev.2009.12.008>
- Bäckman, L., Nyberg, L., Lindenberger, U., Li, S.-C., & Farde, L. (2006). The correlative triad among aging, dopamine, and cognition: Current status and future prospects. *Neuroscience & Biobehavioral Reviews*, 30(6), 791–807. <https://doi.org/10.1016/j.neubiorev.2006.06.005>
- Berry, A. S., Shah, V. D., Baker, S. L., Vogel, J. W., O’Neil, J. P., Janabi, M., ... Jagust, W. J. (2016). Aging Affects Dopaminergic Neural Mechanisms of Cognitive Flexibility. *The Journal of Neuroscience*, 36(50), 12559–12569. <https://doi.org/10.1523/JNEUROSCI.0626-16.2016>
- Braskie, M. N., Wilcox, C. E., Landau, S. M., O’Neil, J. P., Baker, S. L., Madison, C. M., ... Jagust, W. J. (2008). Relationship of Striatal Dopamine Synthesis Capacity to Age and Cognition. *Journal of Neuroscience*, 28(52), 14320–14328. <https://doi.org/10.1523/JNEUROSCI.3729-08.2008>

- Braver, T. S., Cohen, J. D., Nystrom, L. E., Jonides, J., Smith, E. E., & Noll, D. C. (1997). A Parametric Study of Prefrontal Cortex Involvement in Human Working Memory. *NeuroImage*, 5(1), 49–62. <https://doi.org/10.1006/nimg.1996.0247>
- Cabeza, R., Nyberg, L., & Park, D. C. (Eds.). (2016). *Cognitive neuroscience of aging: Linking cognitive and cerebral aging*. Oxford University Press.
- Carson, R. E., Barker, W. C., Liow, J. S., & Johnson, C. A. (2003, October). Design of a motion-compensation OSEM list-mode algorithm for resolution-recovery reconstruction for the HRRT. In *Nuclear Science Symposium Conference Record, 2003 IEEE* (Vol. 5, pp. 3281-3285). IEEE.
- Chen, P. S., Kuang Yang, Y., Lee, Y.-S., Yeh, T. L., Lee, I. H., Chiu, N. T., & Chu, C. L. (2005). Correlation between different memory systems and striatal dopamine D2/D3 receptor density: a single photon emission computed tomography study. *Psychological Medicine*, 35(2), 197–204. <https://doi.org/10.1017/S0033291704003101>
- Constantinidis, C., & Klingberg, T. (2016). The neuroscience of working memory capacity and training. *Nature Reviews Neuroscience*, 17(7), 438–449. <https://doi.org/10.1038/nrn.2016.43>
- Crowe, S. F. (1998). The differential contribution of mental tracking, cognitive flexibility, visual search, and motor speed to performance on parts A and B of the Trail Making Test. *Journal of clinical psychology*, 54(5), 585-591.
- Dang, L. C., O’Neil, J. P., & Jagust, W. J. (2012). Dopamine Supports Coupling of Attention-Related Networks. *Journal of Neuroscience*, 32(28), 9582–9587. <https://doi.org/10.1523/JNEUROSCI.0909-12.2012>
- Dang, Linh C., O’Neil, J. P., & Jagust, W. J. (2013). Genetic effects on behavior are mediated by neurotransmitters and large-scale neural networks. *NeuroImage*, 66, 203–214. <https://doi.org/10.1016/j.neuroimage.2012.10.090>

- Dreher, J.-C., Meyer-Lindenberg, A., Kohn, P., & Berman, K. F. (2008). Age-related changes in midbrain dopaminergic regulation of the human reward system. *Proceedings of the National Academy of Sciences*, *105*(39), 15106–15111. <https://doi.org/10.1073/pnas.0802127105>
- Erixon-Lindroth, N., Farde, L., Robins Wahlin, T.-B., Sovago, J., Halldin, C., & Bäckman, L. (2005). The role of the striatal dopamine transporter in cognitive aging. *Psychiatry Research: Neuroimaging*, *138*(1), 1–12. <https://doi.org/10.1016/j.psychresns.2004.09.005>
- Friston, K. J., Ashburner, J., Frith, C. D., Poline, J. B., Heather, J. D., & Frackowiak, R. S. (1995). Spatial registration and normalization of images. *Human brain mapping*, *3*(3), 165-189.
- Garrett, D. D., Nagel, I. E., Preuschhof, C., Burzynska, A. Z., Marchner, J., Wiegert, S., ... & Heekeren, H. R. (2015). Amphetamine modulates brain signal variability and working memory in younger and older adults. *Proceedings of the National Academy of Sciences*, *112*(24), 7593-7598. <https://doi.org/10.1073/pnas.1504090112>
- Grady, C. (2012). The cognitive neuroscience of ageing. *Nature Reviews Neuroscience*, *13*(7), 491.
- Hammers, A., Allom, R., Koeppe, M. J., Free, S. L., Myers, R., Lemieux, L., ... Duncan, J. S. (2003). Three-dimensional maximum probability atlas of the human brain, with particular reference to the temporal lobe. *Human Brain Mapping*, *19*(4), 224–247. <https://doi.org/10.1002/hbm.10123>
- Horn, J. L., & Cattell, R. B. (1967). Age differences in fluid and crystallized intelligence. *Acta Psychologica*, *26*, 107–129.
- Jagust, W., & D'Esposito, M. (Eds.). (2009). *Imaging the aging brain*. New York.: Oxford University Press.
- Jin, X., Chan, C., Mulnix, T., Panin, V., Casey, M. E., Liu, C., & Carson, R. E. (2013). List-mode reconstruction for the Biograph mCT with physics modeling and event-by-event motion



correction. *Physics in Medicine and Biology*, 58(16), 5567–5591. <https://doi.org/10.1088/0031-9155/58/16/5567>

Karalija, N., Papenberg, G., Wåhlin, A., Johansson, J., Andersson, M., Axelsson, J., ... & Nyberg, L. (in press). C957T-mediated Variation in Ligand Affinity Affects the Association between 11C-raclopride Binding Potential and Cognition. *Journal of cognitive neuroscience*, 1-12.

Karlsson, S., Nyberg, L., Karlsson, P., Fischer, H., Thilers, P., MacDonald, S., ... Bäckman, L. (2009). Modulation of striatal dopamine D1 binding by cognitive processing. *NeuroImage*, 48(2), 398–404. <https://doi.org/10.1016/j.neuroimage.2009.06.030>

Karrer, T.M., Josef, A.K., Mata, R., Morris, E.D., Samanez-Larkin, G.R. (2017) Reduced dopamine receptors and transporters but not synthesis capacity in normal aging adults: a meta-analysis. *Neurobiology of Aging*, 57, 36–46.

Lammertsma, A. A., & Hume, S. P. (1996). Simplified Reference Tissue Model for PET Receptor Studies. *NeuroImage*, 4(3), 153–158. <https://doi.org/10.1006/nimg.1996.0066>

Landau, S. M., Lal, R., O’Neil, J. P., Baker, S., & Jagust, W. J. (2009). Striatal Dopamine and Working Memory. *Cerebral Cortex*, 19(2), 445–454. <https://doi.org/10.1093/cercor/bhn095>

Lappin, J. M., Reeves, S. J., Mehta, M. A., Egerton, A., Coulson, M., & Grasby, P. M. (2009). Dopamine Release in the Human Striatum: Motor and Cognitive Tasks Revisited. *Journal of Cerebral Blood Flow & Metabolism*, 29(3), 554–564. <https://doi.org/10.1038/jcbfm.2008.146>

Lövdén, M., Karalija, N., Andersson, M., Wåhlin, A., Jan Axelsson, Köhncke, Y., ... Lindenberger, U. (2017). Latent-Profile Analysis Reveals Behavioral and Brain Correlates of Dopamine-Cognition Associations. *Cerebral Cortex*, 1–14. <https://doi.org/10.1093/cercor/bhx253>

Mawlawi, O., Martinez, D., Slifstein, M., Broft, A., Chatterjee, R., Hwang, D.-R., ... Laruelle, M. (2001). Imaging Human Mesolimbic Dopamine Transmission with Positron Emission

Tomography: I. Accuracy and Precision of D2 Receptor Parameter Measurements in Ventral Striatum. *Journal of Cerebral Blood Flow & Metabolism*, 21(9), 1034–1057.

<https://doi.org/10.1097/00004647-200109000-00002>

Miller, K. M., Price, C. C., Okun, M. S., Montijo, H., & Bowers, D. (2009). Is the N-Back Task a Valid Neuropsychological Measure for Assessing Working Memory? *Archives of Clinical Neuropsychology*, 24(7), 711–717. <https://doi.org/10.1093/arclin/acp063>

Mozley, L. H., Gur, R. C., Mozley, P. D., & Gur, R. E. (2001). Striatal Dopamine Transporters and Cognitive Functioning in Healthy Men and Women. *American Journal of Psychiatry*, 158(9), 1492–1499. <https://doi.org/10.1176/appi.ajp.158.9.1492>

Mukherjee, J., Christian, B. T., Dunigan, K. A., Shi, B., Narayanan, T. K., Satter, M., & Mantil, J. (2002). Brain imaging of 18F-fallypride in normal volunteers: Blood analysis, distribution, test-retest studies, and preliminary assessment of sensitivity to aging effects on dopamine D-2/D-3 receptors. *Synapse*, 46(3), 170–188. <https://doi.org/10.1002/syn.10128>

Nevalainen, N., Riklund, K., Andersson, M., Axelsson, J., Ögren, M., Lövdén, M., ... & Nyberg, L. (2015). COBRA: A prospective multimodal imaging study of dopamine, brain structure and function, and cognition. *Brain research*, 1612, 83-103.

Park, D.C., & Schwarz, N. (Eds.). (2000). *Cognitive Aging: A Primer*. Psychology Press.

Parmenter, B. A., Shucard, J. L., Benedict, R. H., & Shucard, D. W. (2006). Working memory deficits in multiple sclerosis: Comparison between the n-back task and the Paced Auditory Serial Addition Test. *Journal of the International Neuropsychological Society*, 12(5), 677-687.

Plavén-Sigray, P., Hedman, E., Victorsson, P., Matheson, G. J., Forsberg, A., Djurfeldt, D. R., ... & Cervenka, S. (2017). Extrastriatal dopamine D2-receptor availability in social anxiety disorder. *European Neuropsychopharmacology*, 27(5), 462-469.

- Raz, N., & Lindenberger, U. (2011). Only Time will Tell: Cross-sectional Studies Offer no Solution to the Age-Brain-Cognition Triangle—Comment on. *Psychological Bulletin*, 137(5), 790–795. <https://doi.org/10.1037/a0024503>
- Reeves, S. J., Grasby, P. M., Howard, R. J., Bantick, R. A., Asselin, M.-C., & Mehta, M. A. (2005). A positron emission tomography (PET) investigation of the role of striatal dopamine (D2) receptor availability in spatial cognition. *NeuroImage*, 28(1), 216–226. <https://doi.org/10.1016/j.neuroimage.2005.05.034>
- Rubin, D. C. (1999). Frontal-Striatal Circuits in Cognitive Aging: Evidence for Caudate Involvement. *Aging, Neuropsychology, and Cognition*, 6(4), 241–259. [https://doi.org/10.1076/1382-5585\(199912\)06:04;1-B:FT241](https://doi.org/10.1076/1382-5585(199912)06:04;1-B:FT241)
- Salami, A., Rieckmann, A., Karalija, N., Avelar-Pereira, B., Andersson, M., Wåhlin, A., ... Nyberg, L. (2018). Neurocognitive Profiles of Older Adults with Working-Memory Dysfunction. *Cerebral Cortex*, 28(7), 2525–2539. <https://doi.org/10.1093/cercor/bhy062>
- Sandiego, C. M., Gallezot, J.-D., Lim, K., Ropchan, J., Lin, S., Gao, H., ... Cosgrove, K. P. (2015). Reference region modeling approaches for amphetamine challenge studies with [11C]FLB 457 and PET. *Journal of Cerebral Blood Flow & Metabolism*, 35(4), 623–629. <https://doi.org/10.1038/jcbfm.2014.237>
- Sawaguchi, T. (2001). The effects of dopamine and its antagonists on directional delay-period activity of prefrontal neurons in monkeys during an oculomotor delayed-response task. *Neuroscience Research*, 41(2), 115–128. [https://doi.org/10.1016/S0168-0102\(01\)00270-X](https://doi.org/10.1016/S0168-0102(01)00270-X)
- Sawaguchi, T., & Goldman-Rakic, P. S. (1991). D1 Dopamine Receptors in Prefrontal Cortex: Involvement in Working Memory. *Science; Washington*, 251(4996), 947.

- Smith, C. T., Crawford, J. L., Dang, L. C., Seaman, K. L., San Juan, M. D., Vijay, A., ... Samanez-Larkin, G. R. (2017). Partial-volume correction increases estimated dopamine D2-like receptor binding potential and reduces adult age differences. *Journal of Cerebral Blood Flow & Metabolism*, 0271678X1773769. <https://doi.org/10.1177/0271678X17737693>
- Smith, C. T., Dang, L. C., Cowan, R. L., Kessler, R. M., & Zald, D. H. (2016). Variability in paralimbic dopamine signaling correlates with subjective responses to d-amphetamine. *Neuropharmacology*, 108, 394–402. <https://doi.org/10.1016/j.neuropharm.2016.05.004>
- Vandehey, N. T., Moirano, J. M., Converse, A. K., Holden, J. E., Mukherjee, J., Murali, D., ... Christian, B. T. (2010). High-Affinity Dopamine D<sub>2</sub>/D<sub>3</sub> PET Radioligands <sup>18</sup>F-Fallypride and <sup>11</sup>C-FLB457: A Comparison of Kinetics in Extrastriatal Regions Using a Multiple-Injection Protocol. *Journal of Cerebral Blood Flow & Metabolism*, 30(5), 994–1007. <https://doi.org/10.1038/jcbfm.2009.270>
- Wager, T. D., & Smith, E. E. (2003). Neuroimaging studies of working memory: *Cognitive, Affective, & Behavioral Neuroscience*, 3(4), 255–274. <https://doi.org/10.3758/CABN.3.4.255>
- Wang, Y., Chan, G. L. Y., Holden, J. E., Dobko, T., Mak, E., Schulzer, M., ... Stoessl, A. J. (1998). Age-dependent decline of dopamine D1 receptors in human brain: A PET study. *Synapse*, 30(1), 56–61. [https://doi.org/10.1002/\(SICI\)1098-2396\(199809\)30:1<56::AID-SYN7>3.0.CO;2-J](https://doi.org/10.1002/(SICI)1098-2396(199809)30:1<56::AID-SYN7>3.0.CO;2-J)
- Zald, D. H., Woodward, N. D., Cowan, R. L., Riccardi, P., Ansari, M. S., Baldwin, R. M., ... Kessler, R. M. (2010). The interrelationship of dopamine D2-like receptor availability in striatal and extrastriatal brain regions in healthy humans: A principal component analysis of [<sup>18</sup>F]fallypride binding. *NeuroImage*, 51(1), 53–62. <https://doi.org/10.1016/j.neuroimage.2010.02.006>
